# Supplementary material
Source: MDPI journal article supplement (https://www.mdpi.com/2227-9040/11/12/575)
Supplement: s1 [file s1 › chemosensors-2715990-supplementary.pdf]

# **Electrochemical Sensing of Vitamin D<sub>3</sub>: A Comparative Use of Glassy Carbon and Unmodified Screen-Printed Carbon Electrodes**

Fátima Daniela Gonçalves<sup>1</sup>, José António Rodrigues<sup>1</sup>, Rui Miguel Ramos<sup>1\*</sup>

<sup>1</sup>LAQV-REQUIMTE, Departamento de Química e Bioquímica, Faculdade de Ciências, Universidade do Porto, Rua do Campo Alegre, s/n, 4169-007 Porto, Portugal

\* Corresponding Author:

Departamento de Química e Bioquímica, Faculdade de Ciências, Universidade do Porto

Rua do Campo Alegre, s/n, 4169-007 Porto, Portugal

(e-mail) [rui.amos@fc.up.pt](mailto:rui.amos@fc.up.pt)

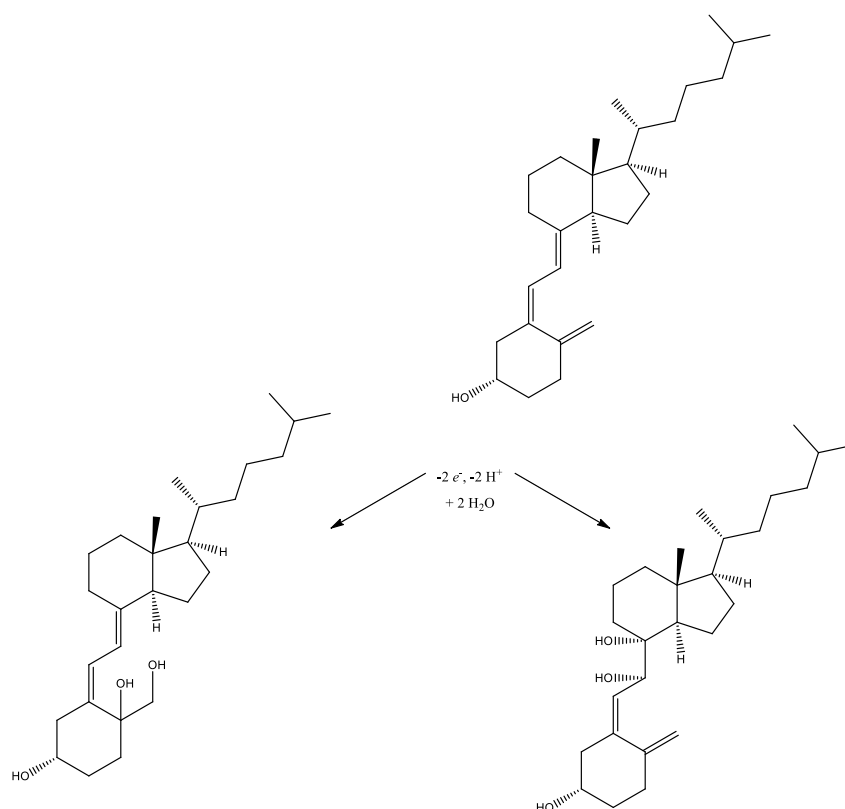

Figure S1 – Two possible oxidation mechanisms of Vitamin D<sub>3</sub>.

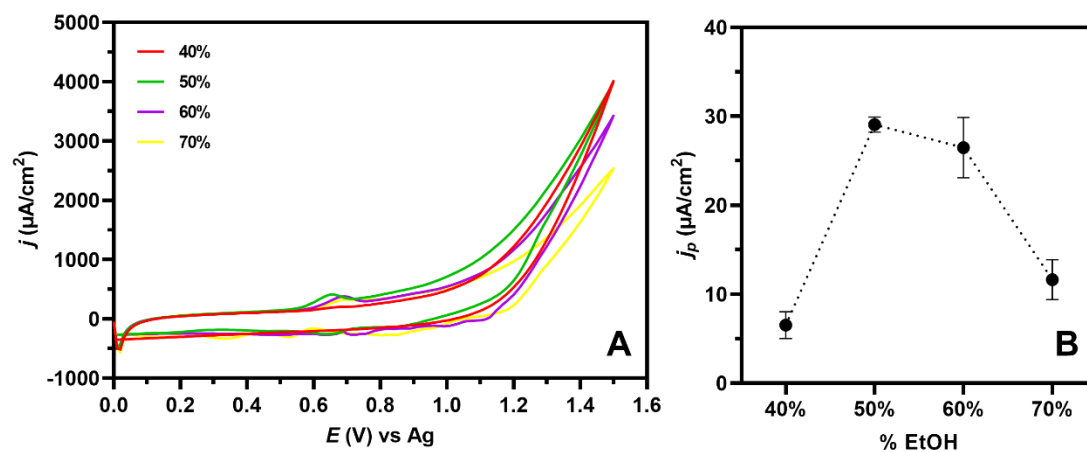

Figure S2 – Cyclic voltammograms of 0.90 mmol L<sup>-1</sup> vitamin D<sub>3</sub> in 0.1 M LiClO<sub>4</sub> prepared in different proportions of ethanol/water using a SPCE. Voltammograms were measured between 0 V and + 1.5 V; scan rate of 50 mV s<sup>-1</sup>; step potential of 10 mV. Three replicates were performed for each ethanol content.

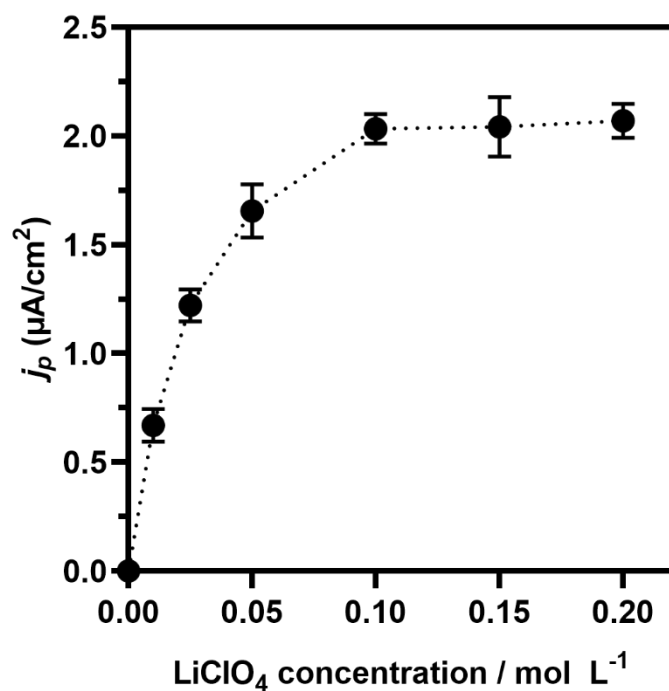

Figure S3 – Dependence of peak current on the concentration of lithium perchlorate in the supporting electrolyte solution, prepared in 50/50 ethanol/water. Measurements, in triplicate, were performed on the GCE system by SWV on a 0.1 mmol L<sup>-1</sup> Vitamin D<sub>3</sub> solution. Voltammograms were measured between 0 V and + 1.5 V; frequency of 50 Hz; amplitude of 50 mV and step potential of 5 mV.

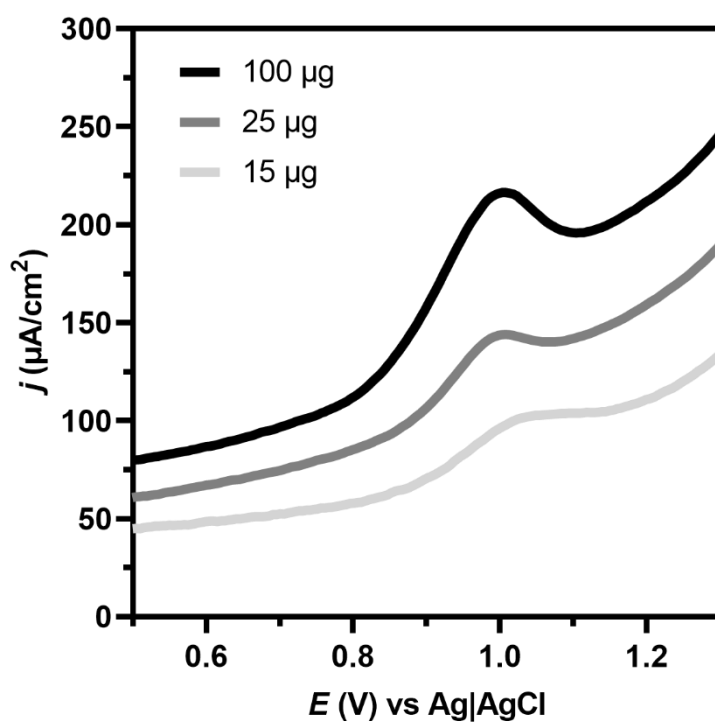

Figure S4 - Representative square-wave voltammograms on the GCE of the analysed Vitamin D<sub>3</sub> samples, obtained in 50/50 ethanol/water solution. SWV was performed using the optimized electrochemical conditions.
